# Supplementary material
Source: PubMed Central journal article supplement (PMC2677224)

Figure 4. Northern range limits of NE Pacific marine bivalve species separated by families. Each color represents a family. Because of the large number of families, the same eight colors had to be repeated. Where species ranges (individual lines) intersect the x-axis, the southern limit is south of the equator. These data indicate significant phylogenetic conservatism of northern limits at the family level (see text for details)

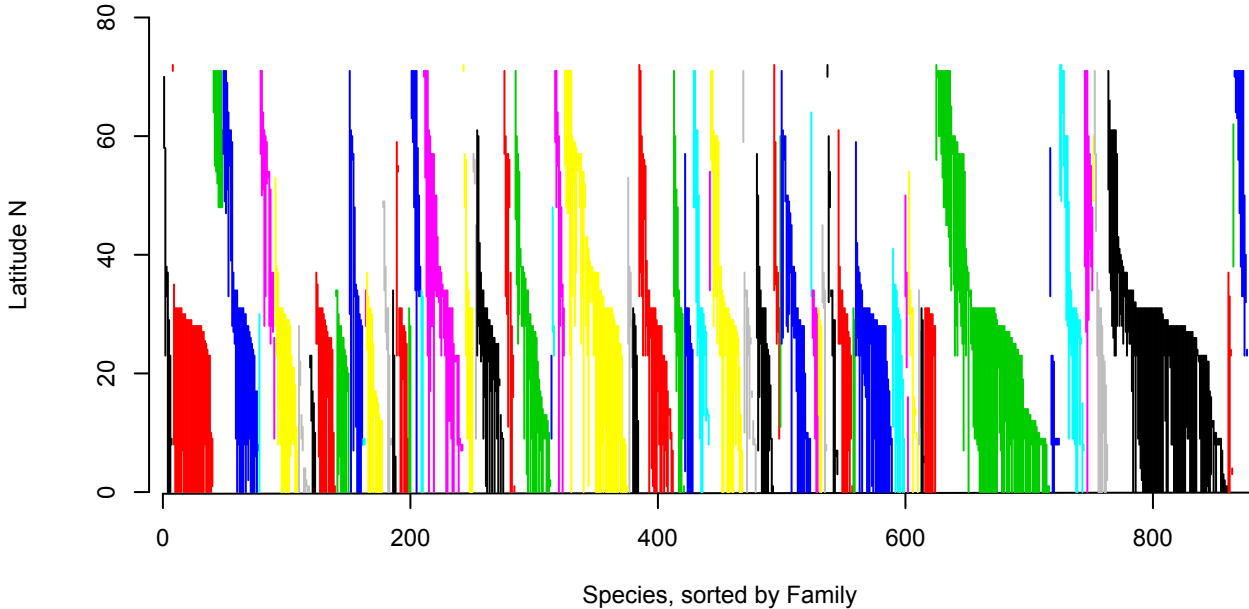

Supplement: rspb20081232s07.pdf [file rspb20081232s07.pdf]
